# Supplementary material for: Locomotor Strategy to Perform 6-Minute Walk Test in People with Multiple Sclerosis: A Prospective Observational Study
Source: MDPI journal article supplement (doi:10.3390/s23073407), 2023-03-24
Supplement: s1 [file s1]

**Supplementary data SA:** Spatio-temporal variables during each interval of the 6MWT for PwMS with moderate and severe MS.

1

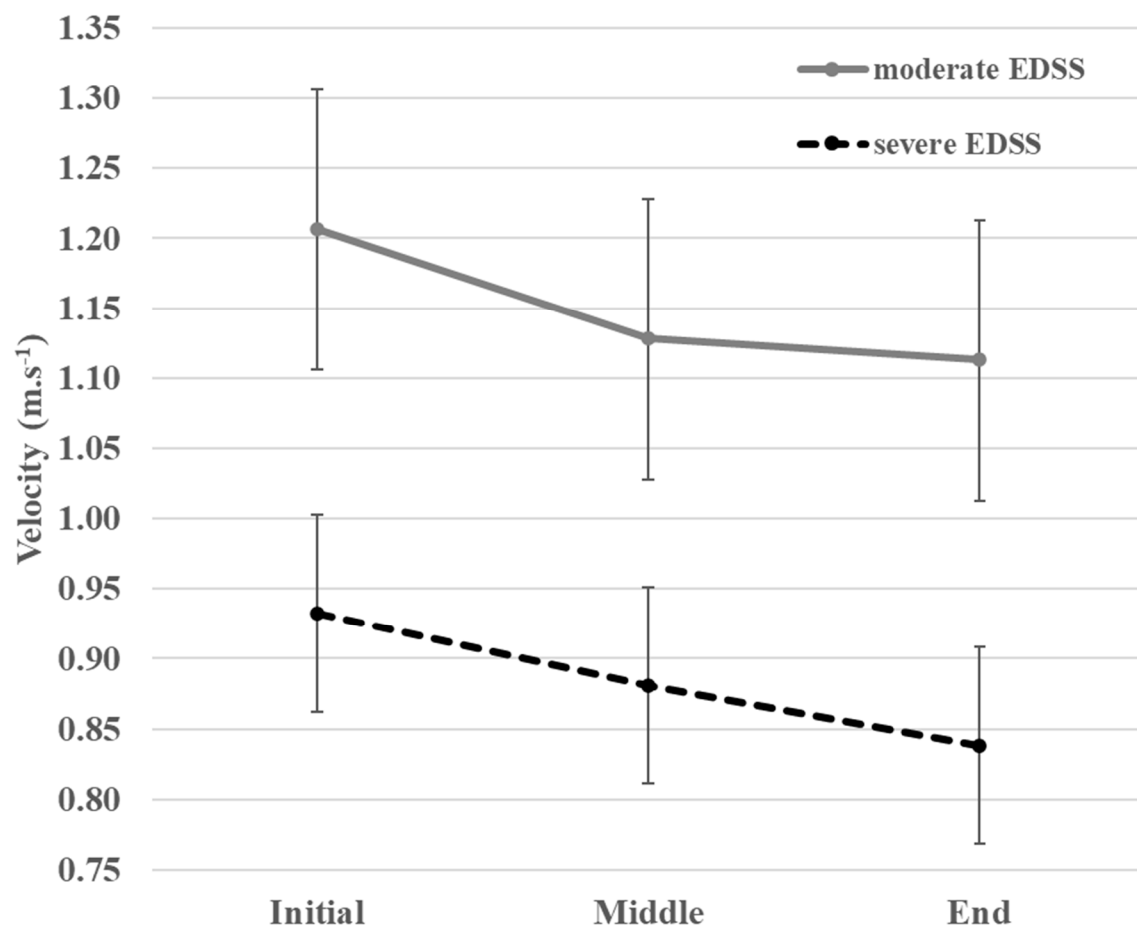

| Moderate EDSS [4] (n=22)               |                   |               |               |
|----------------------------------------|-------------------|---------------|---------------|
| 6MWT interval                          |                   |               |               |
| ST variables                           | Initial           | Middle        | End           |
| <i>Velocity (m.s<sup>-1</sup>)</i>     | 1.21 (0.24)       | 1.13 (0.24)   | 1.11 (0.24)   |
| <i>Cadence (step.min<sup>-1</sup>)</i> | 111.32<br>(10.52) | 107.93 (9.48) | 106.36 (9.88) |
| <i>Stride length (m)</i>               | 1.29 (0.20)       | 1.27 (0.21)   | 1.25 (0.21)   |
| <i>Stride width (m)</i>                | 0.14 (0.04)       | 0.15 (0.04)   | 0.15 (0.04)   |
| <i>Double support time (% GC)</i>      | 31 (4.18)         | 32 (4.21)     | 32 (4.62)     |

| Severe EDSS [4.5-6.5] (n=23)           |                |               |               |
|----------------------------------------|----------------|---------------|---------------|
| 6MWT interval                          |                |               |               |
| ST variables                           | Initial        | Middle        | End           |
| <i>Velocity (m.s<sup>-1</sup>)</i>     | 0.93 (0.23)    | 0.88 (0.23)   | 0.84 (0.23)   |
| <i>Cadence (step.min<sup>-1</sup>)</i> | 100.06 (13.27) | 95.11 (13.42) | 91.97 (13.90) |
| <i>Stride length (m)</i>               | 1.11 (0.19)    | 1.06 (0.19)   | 1.02 (0.19)   |
| <i>Stride width (m)</i>                | 0.14 (0.05)    | 0.15 (0.04)   | 0.15 (0.04)   |
| <i>Double support time (% GC)</i>      | 34 (6.16)      | 36 (6.55)     | 37 (6.68)     |

**Supplementary data SB:** Spatio-temporal variables during each interval of 6MWT for PwMS with PP, RR and SP phenotype

1

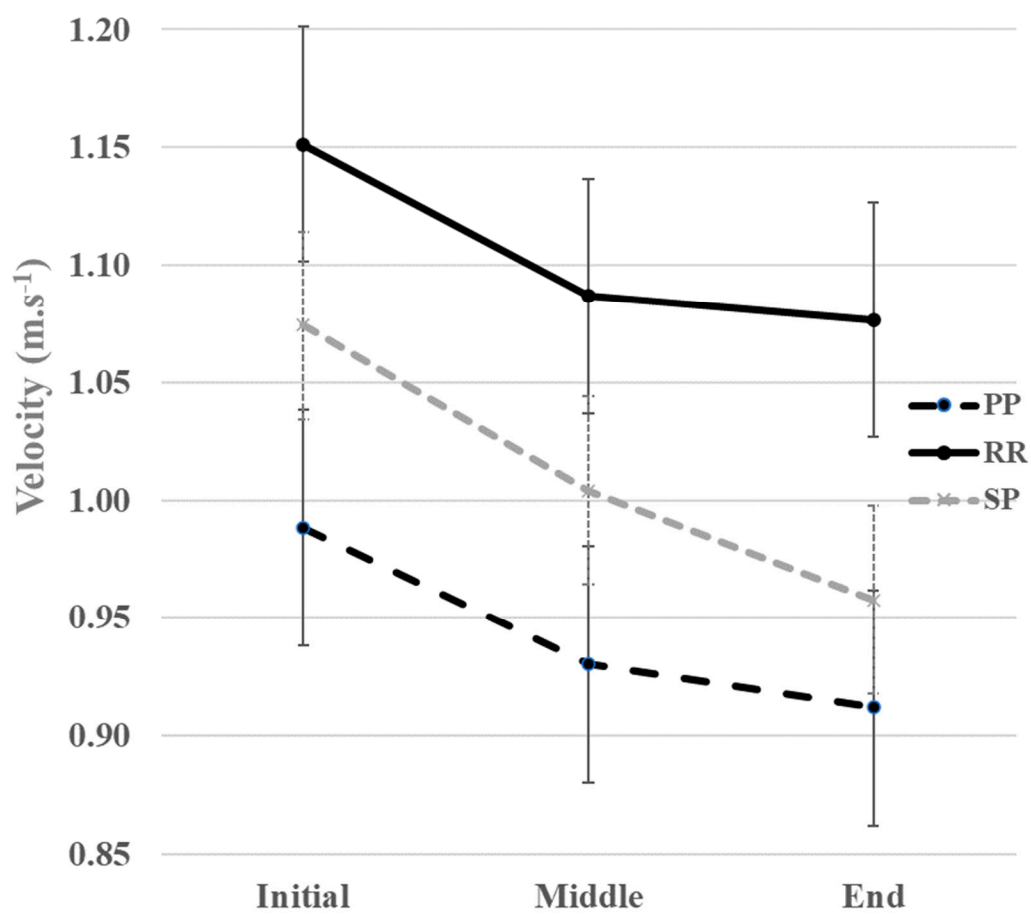

| 6MWT interval                          |                                |                  |                  |                                |                  |                  |                                |                   |                  |
|----------------------------------------|--------------------------------|------------------|------------------|--------------------------------|------------------|------------------|--------------------------------|-------------------|------------------|
| ST variables <sup>a</sup>              | PwMS with PP phenotype (n= 14) |                  |                  | PwMS with RR phenotype (n= 11) |                  |                  | PwMS with SP phenotype (n= 20) |                   |                  |
|                                        | Initial                        | Middle           | End              | Initial                        | Middle           | End              | Initial                        | Middle            | End              |
| <i>Velocity (m.s<sup>-1</sup>)</i>     | 0.98 (0.31)                    | 0.93 (0.32)      | 0.91 (0.31)      | 1.15 (0.22)                    | 1.09 (0.25)      | 1.08 (0.20)      | 1.07 (0.26)                    | 1.00 (0.25)       | 0.96 (0.27)      |
| <i>Cadence (step.min<sup>-1</sup>)</i> | 101.98<br>(15.16)              | 97.66<br>(15.49) | 96.61<br>(15.46) | 109.63<br>(7.00)               | 105.78<br>(6.88) | 104.30<br>(7.02) | 105.83<br>(14.12)              | 101.55<br>(13.96) | 98.06<br>(14.62) |
| <i>Stride length (m)</i>               | 1.14 (0.27)                    | 1.12 (0.27)      | 1.11 (0.28)      | 1.25 (0.20)                    | 1.22 (0.23)      | 1.21 (0.20)      | 1.21 (0.17)                    | 1.17 (0.18)       | 1.14 (0.19)      |
| <i>Stride width (m)</i>                | 0.14 (0.03)                    | 0.15 (0.04)      | 0.15 (0.04)      | 0.12 (0.03)                    | 0.13 (0.03)      | 0.14 (0.03)      | 0.14 (0.06)                    | 0.15 (0.05)       | 0.15 (0.05)      |
| <i>Double support time (% GC)</i>      | 35 (7.31)                      | 36 (7.91)        | 37 (7.85)        | 32 (4.27)                      | 33 (4.40)        | 34 (4.44)        | 31 (4.07)                      | 32 (4.25)         | 32 (4.72)        |
